# Successful Control of Methicillin-Resistant *Staphylococcus aureus* in Endemic Neonatal Intensive Care Units—A 7-Year Campaign

Yhu-Chering Huang<sup>1,3,5\*</sup>, Rey-In Lien<sup>2,5</sup>, Lin-Hui Su<sup>3,4,5</sup>, Yi-Hong Chou<sup>2</sup>, Tzou-Yien Lin<sup>1,3,5</sup>

**1** Division of Pediatric Infectious Diseases, Chang Gung Memorial Hospital at Linkou, Kweishan, Taoyuan, Taiwan, **2** Division of Neonatology, Chang Gung Memorial Hospital at Linkou, Kweishan, Taoyuan, Taiwan, **3** Committee of Infection Control, Chang Gung Memorial Hospital at Linkou, Kweishan, Taoyuan, Taiwan, **4** Department of Laboratory Medicine, Chang Gung Memorial Hospital at Linkou, Kweishan, Taoyuan, Taiwan, **5** School of Medicine, Chang Gung University, Kweishan, Taoyuan, Taiwan

## Abstract

**Background:** Methicillin-resistant *Staphylococcus aureus* (MRSA) is among the most important nosocomial pathogens in the intensive care unit (ICU) worldwide, including Taiwan. Since 1997, our neonatal ICUs (NICUs) had become endemic for MRSA.

**Methodology/Principal Findings:** To control MRSA spread in our NICUs, we implemented a series of infection control measures stepwise, including reinforcement of hand hygiene since January 2000, augmentation of aseptic care over the insertion site of central venous catheter since July 2001, introduction of alcohol-based handrubs since April 2003, surveillance culture for MRSA and cohort care for the colonized patients between March 2003 and February 2004, and surveillance culture with subsequent decolonization of MRSA between August 2005 and July 2006. After implementation of these measures, MRSA healthcare-associated infection (HAI) density reduced by 92%, from 5.47 episodes per 1000 patient-days in 1999 to 0.45 episodes per 1000 patient-days in 2006; MRSA bloodstream infection reduced from 40 cases in 1999 to only one case in 2006. Compared to those obtained during the period of surveillance culture without decolonization, both rates of MRSA colonization (8.6% vs. 41%,  $p < 0.001$ ) and infection (1.1% vs. 12%,  $p < 0.001$ ) decreased significantly during the period of surveillance and decolonization. Molecular analysis of the clinical isolates during the study period showed that the endemic clone, which dominated between 1998 and 2005, almost disappeared in 2006, while the community clones increased significantly in 2006–2007.

**Conclusion/Significance:** Through infection control measures, MRSA HAIs can be successfully controlled, even in areas with high levels of endemic MRSA infections such as our NICUs.

**Citation:** Huang Y-C, Lien R-I, Su L-H, Chou Y-H, Lin T-Y (2011) Successful Control of Methicillin-Resistant *Staphylococcus aureus* in Endemic Neonatal Intensive Care Units—A 7-Year Campaign. PLoS ONE 6(8): e23001. doi:10.1371/journal.pone.0023001

**Editor:** Sarah K. Highlander, Baylor College of Medicine, United States of America

**Received:** April 20, 2011; **Accepted:** July 5, 2011; **Published:** August 12, 2011

**Copyright:** © 2011 Huang et al. This is an open-access article distributed under the terms of the Creative Commons Attribution License, which permits unrestricted use, distribution, and reproduction in any medium, provided the original author and source are credited.

**Funding:** This study was supported by grants from the National Science Council (NSC 94-2314-B-182A-090, 96-2314-B-182A-022) and Chang Gung Memorial Hospital (CMRPG 33128). The funders had no role in study design, data collection and analysis, decision to publish.

**Competing Interests:** The authors have declared that no competing interests exist.

\* E-mail: ychuang@cgmh.org.tw

## Introduction

Methicillin-resistant *Staphylococcus aureus* (MRSA) is among the most important pathogens of bacteremia in the intensive care units (ICU). Nowadays, MRSA becomes endemic in most hospitals around the world [1,2] and accounts for 40–60% of all healthcare-associated *S. aureus* infections. Colonized patients are the major reservoirs of MRSA in hospitals. Colonizing strains may serve as endogenous sources for overt clinical infections or may spread to other patients [3–11]. To reduce and control healthcare-associated infections (HAIs) caused by MRSA, a “search and destroy” strategy, which first detects the patients with MRSA colonization and then decolonizes the MRSA with certain antimicrobial agents, was recently proposed and implemented in some hospitals of different countries, with inconsistent effects [12–16].

In Taiwan, MRSA was first documented in early 1980s and rapidly increased in 1990s [17]. In 2000, methicillin resistance had been identified in 53–83% of all *S. aureus* isolates in 12 major

hospitals of Taiwan [18]. In our neonatal ICUs (NICUs), *S. aureus* is the leading pathogen of HAIs and MRSA represented majority of all the *S. aureus* isolates since 1997. Between 1997 and 1999, the prevalence of *S. aureus* among the HAIs increased significantly from 32.4% in 1997, 43.6% in 1998, to 52.6% in 1999. The percentage of MRSA among *S. aureus* isolates also rose significantly from 87.2% in 1997, 92.1% in 1998, to 95.1% in 1999 [19]. Apparently, our NICUs were endemic for MRSA. We then implemented a series of infection control interventions stepwise in our NICUs to try to reduce HAIs caused by MRSA. After a 7-year campaign, MRSA HAIs was successfully controlled temporarily with the implementation of the strategy of “search and destroy”. Here, we report our experiences for MRSA control in the NICUs.

## Methods

Chang Gung Children’s Hospital is a university-affiliated teaching hospital, situated in northern Taiwan, that provides a

range of care, from primary to tertiary care, and is a part of Chang Gung Memorial Hospital (CGMH). There are three NICUs, distributed on 2 floors, in this children's Hospital. Currently, there are 17 and 20 beds in NICU-1, and NICU-2, respectively. NICU-3 included two areas, 12 level-III beds in area 1 and 45 non-level-III beds in area 2 (special care nurseries). All the healthcare-associated infections (HAIs) in three NICUs from 1999 to 2007 were prospectively collected and recorded according to the standard definition of HAIs [20].

## Ethics

The study included the institution's healthcare infection data, which were routinely collected and reported by the institution's infection control committee, and was also among the institution's quality-improvement programs proposed by the institution's infection control committee. Since active surveillance for MRSA control is considered to be quality improvement, IRB approval was not required to be included when application for the grants and thus the study was not reviewed by the institutional review board (IRB) of Chang Gung Memorial Hospital at that time and informed consent could be waived [21].

## Implementation of infection control interventions

Since 2000, a series of infection control interventions were implemented stepwise in our NICUs to try to reduce healthcare-associated infections caused by MRSA (Table 1). We firstly reinforced hand washing before and after contact with the infants hospitalized in NICUs since January 2000 by increasing infection control education of, increasing infection control practitioner's audits of, and feedback of HAIs data to the health care workers (HCWs) working in NICUs. From a case-control study conducted in 2001, we found that the presence of skin infection at onset was one of the risk factors for MRSA bacteremia in these infants [22]. Standardized operation procedures for the insertion and the continuous care of peripherally inserted central venous catheter (PICC) were revised, aiming to accelerate the placement process (by a designated team) and to improve the aseptic care over the insertion site. Briefly, after successful insertion, 10% povidone-iodine containing alcohol (75%) was applied to the insertion site, normal saline used to decolorize, and the area was covered by a transparent dressing ("Tegaderm"). Nurses checked the insertion site frequently and changed the dressing every 3 days. The PICC lines were not impregnated with antibacterial or antiseptic agents and antibiotic lock prophylaxis was not used. The strategy commenced in July 2001.

From March 2003 to February 2004, screening for MRSA carriage among the hospitalized infants at NICU-1 and -2 was conducted [23], which was supported by the research grants. During the NICUs stay, specimens from the nares, postauricular

areas, axillae, and umbilicus were obtained weekly and sent for detection of MRSA. The infants with MRSA colonization, if identified, were separated from non-colonized infants and placed in a segregated area of the units, and cohort care by designated nurses was implemented. Almost at the same time, the outbreak of severe acute respiratory syndrome (SARS) occurred in Taiwan, and alcohol-based handrubs were introduced into the hospital in April 2003 and were used in these NICUs thereafter.

From August 2005 to July 2006, we implemented the "search and destroy" strategy into NICU-1 and -2, which was also supported by the research grants. From the previous surveillance study [22], we learned that nearly 90% of the colonized infants are detected within the first 2 weeks of admission and sampling of both nares and umbilicus is adequate for surveillance cultures in this population. Hence, during this period, only specimens from both nares and umbilicus were obtained, within 24 hours of admission and then weekly for two weeks (3 times in total). In addition to placing the colonizing infants in a segregated area and cohort care, decolonization procedures with topical mupirocin ointment application to nares and umbilical area were administered twice daily for five consecutive days if they still stayed in the NICUs. If an infant with MRSA colonization had MRSA clinical isolates, the clinical isolates as well as the colonized isolates were genotyped and compared. MRSA isolates recovered from clinical diagnostic samples (beyond surveillance culture specimens) submitted to the clinical microbiologic laboratory were regarded as clinical isolates. In accordance with the standard definition of HAIs [20], any infant with clinical isolates of MRSA who was receiving antimicrobial therapy was categorized as experiencing an episode of infection. However, from August 2006 to October 2007, no active surveillance for MRSA was conducted in these NICUs since no research grants supported.

Surveillance cultures for health care workers (HCWs) were performed, during surveillance periods, and specimens were obtained from the nares of HCWs working in both units. Intranasal mupirocin treatment was applied to the nares of each HCW with MRSA colonization.

## Collection, selection and genotyping analysis of MRSA isolates

Specimens for surveillance culture were obtained with a cotton swab, placed in a transport medium (Venturi Transystem), and then processed in the microbiology laboratory within 4 hours. Identification of MRSA was confirmed according to National Committee for Clinical Laboratory Standards guidelines [24].

Except for year 2002, MRSA clinical isolates from the hospitalized infants at these NICUs between 1998 and 2007 were collected and selected for genotyping analysis. For those years with more than 40 clinical MRSA isolates collected (129 isolates in

**Table 1.** Infection control measures implemented in the neonatal intensive care units of Chang Gung Children's Hospital between 1999 and 2007.

| Interventions                                                                               | Period implemented |
|---------------------------------------------------------------------------------------------|--------------------|
| Augmenting hand washing before and after contact with patients                              | Jan 2000~present   |
| Revision of standardized operation procedures for the insertion and continuous care of PICC | Jul 2001~present   |
| Institution of alcohol-based handrubs                                                       | Apr 2003~present   |
| Surveillance culture for MRSA carriage and cohort care                                      | Mar 2003~Feb 2004  |
| Surveillance culture for MRSA carriage and intranasal application of mupirocin ointment     | Aug 2005~Jul 2006  |

PICC, peripherally inserted central venous catheter; MRSA, methicillin-resistant *Staphylococcus aureus*.

doi:10.1371/journal.pone.0023001.t001

2001, 166 isolates in 2003, 140 isolates in 2004, 46 isolates in 2005), at least 40 isolates per year were selected for analysis. For years 2006 and 2007, all the clinical isolates were molecularly characterized since less than 40 clinical isolates per year were identified. A total of 429 clinical isolates were selected for molecular analysis. Part of the genotyping results for a substantial number of MRSA isolates from the years 1999, 2000 and 2003 were published previously [23,25], which are also displayed in this study. Colonized isolates from the infants and HCWs were also molecularly characterized.

The molecular methods included pulsed-field gel electrophoresis (PFGE) with *SmaI* digestion, staphylococcal chromosomal cassette (SCC*mec*) typing, and multilocus sequence type (MLST). In addition, the presence of Pantone-Valentine leukocidin (PVL) genes was also examined. All the procedures were described previously [25–30]. The genotypes of PFGE were designated, as in our previous studies [25–29], in alphabetical order; any new type, if identified, was designated consecutively. PFGE patterns with <4-band differences from an existing genotype were defined as subtypes of that genotype and were labeled with Arabic number suffixes. Two isolates were considered to be indistinguishable, related, or distinct if they had the same subtype, the same genotype, or a different type, respectively.

### Statistic analysis

We compared MRSA colonization and subsequent infection between the infants with and without topical mupirocin treatment by means of  $\chi^2$  (continuity-adjusted) or Student's *t* tests. Relative risk and/or odds ratios (ORs) were calculated with 95% confidence intervals (CIs). Healthcare-associated infection density and MRSA HAI density from 1999 to 2007 were analyzed by Mantel-Haenszel Chi-square test. Statistical analyses of the data were performed with EpiInfo, version 6 (Centers for Disease Control and Prevention, Atlanta, GA) and SAS for Windows, version 6.11 (SAS Institute, Cary, NC).

## Results

### Yearly healthcare-associated infection density

Through these infection control measures, HAIs in these 3 NICUs caused by MRSA as well as by all bacterial pathogens

decreased gradually and significantly from 1999 to 2007 (Table 2 and figure 1). The HAI density decreased from 13.5 episodes per 1000 patient-days in 2001 to 5.50 episodes per 1000 patient-days in 2006 ( $p<0.001$ ). Ratio of HAIs caused by MRSA also decreased from 50% in 1999 to 8.3% in 2006 ( $p<0.001$ ) and the HAI bloodstream infection caused by MRSA decreased from 40 cases in 1999 to only one case in 2006. However, all these indices rebounded in 2007 after surveillance culture for MRSA was discontinued.

### Effect of infection control measures

The reduction of MRSA infection was prominently for two specific time periods, from 2001 to 2002 and from 2004 to 2005. For the first time period, we conducted a revised standardized operation procedure for insertion and continuous care of peripherally inserted central venous catheter (PICC), with augmentation of aseptic procedure and care of the insertion of central venous catheter. For the second time period, we conducted the “search and destroy” strategy.

The results of surveillance culture without decolonization were published previously [22] and are summarized in Table 3. Briefly, MRSA colonization was detected for 41% of 783 infants surveyed during their NICU stay and was noted for 91% of 92 infants with MRSA infections. Previous colonization was detected in 68 episodes (81%) of MRSA infections; colonized and clinical isolates were indistinguishable in 63 episodes (93%).

During the period of surveillance and decolonization, MRSA colonization was detected for 8.6% of 452 infants surveyed. Of the 39 infants with colonization, intranasal mupirocin ointment was administered to 26 infants who still stayed in the NICUs. Follow-up cultures were obtained from 18 infants and showed positive in two infants. Second course of intranasal mupirocin ointment was administered in both infants and subsequently eradicated MRSA in both cases. One of them developed MRSA sepsis before the second course of therapy was commenced. All 4 isolates (2 clinical and 2 colonized isolates) from this case were genetically indistinguishable. In addition to this case, 4 additional MRSA infected cases were identified, without previous colonization. Five (5.9%) of 85 health care workers were colonized with MRSA. The comparison between the two periods is shown in Table 3 and significant difference was noted in terms of rates of infection, colonization and colonization with subsequent infection. However, no significant

**Table 2.** Healthcare-associated infections (HAIs) in the neonatal intensive care units of Chang Gung Children's Hospital between 1999 and 2007.

| Year | Patient-days | HAI episodes | HAI density* (%) | HAI by <i>S. aureus</i> No. (%) |         |                       | HA BSI No. (%) |                  |        |
|------|--------------|--------------|------------------|---------------------------------|---------|-----------------------|----------------|------------------|--------|
|      |              |              |                  | <i>S. aureus</i>                | MRSA    | MRSA HAI density* (%) | All pathogens  | <i>S. aureus</i> | MRSA   |
| 1999 | 29,609       | 327          | 11.04            | 171(52)                         | 162(50) | 5.47                  | 146            | 43(29)           | 40(27) |
| 2000 | 28,517       | 332          | 11.64            | 117(35)                         | 116(35) | 4.06                  | 138            | 28(20)           | 28(20) |
| 2001 | 26,452       | 356          | 13.46            | 128(36)                         | 126(35) | 4.76                  | 124            | 36(29)           | 36(29) |
| 2002 | 26,335       | 276          | 10.48            | 78(28)                          | 77(28)  | 2.92                  | 95             | 15(16)           | 15(16) |
| 2003 | 23,658       | 186          | 7.86             | 67(36)                          | 63(34)  | 2.66                  | 59             | 17(29)           | 14(24) |
| 2004 | 26,108       | 211          | 8.08             | 61(29)                          | 59(28)  | 2.26                  | 71             | 12(17)           | 11(16) |
| 2005 | 24,866       | 130          | 5.23             | 28(22)                          | 22(17)  | 0.88                  | 60             | 8(13)            | 6(10)  |
| 2006 | 24,199       | 133          | 5.50             | 19(14)                          | 11(8.3) | 0.45                  | 56             | 1(1.8)           | 1(1.8) |
| 2007 | 25,284       | 140          | 5.54             | 23(16)                          | 18(13)  | 0.71                  | 66             | 9(14)            | 7(11)  |

BSI, bloodstream infection; MRSA, methicillin-resistant *Staphylococcus aureus*.

\*Healthcare-associated infection (HAI) density and MRSA HAI density significantly decreased from 1999 to 2007 by Mantel-Haenszel Chi-Square test ( $p<0.001$ ) for trend. doi:10.1371/journal.pone.0023001.t002

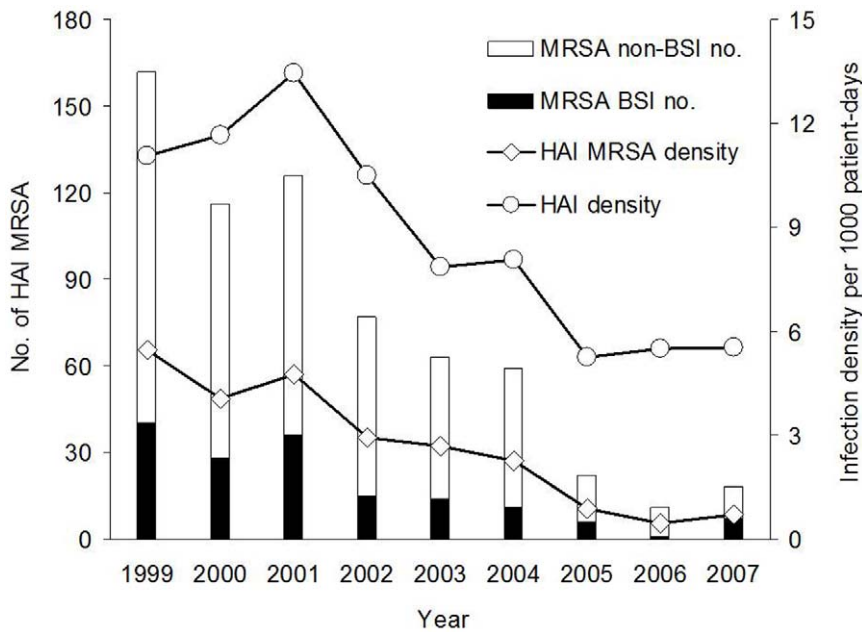

**Figure 1. Healthcare-associated infection (HAI) density, overall and caused by methicillin-resistant *Staphylococcus aureus* (MRSA), in the neonatal intensive care units of Chang Gung Children's Hospital significantly decreased from 1999 to 2007. HA MRSA infection episodes, overall and bloodstream, also decreased markedly.**  
doi:10.1371/journal.pone.0023001.g001

difference was noted in terms of rates of MRSA non-colonized but with infection and colonization of health care workers.

### Molecular characteristics of MRSA clinical and colonized isolates

The detailed molecular characteristics of MRSA isolates are shown in Table 4. From the 429 clinical isolates analyzed, a total of 7 pulsotypes were identified. There were two major clones

and characterized as sequence type (ST) 239 (or its single locus variant)/pulsotype A (Hungary clone)/SCC<sub>mec</sub> III or IIIA/PVL-negative, accounting for 62% of the isolates, and ST59/pulsotype C/SCC<sub>mec</sub> IV/PVL-negative, accounting for 26%. The former clone was dominant (>50% of the isolates) from 1998 to 2004, became weakened (39% of the isolates) in 2005, reached zero in 2006, and then resurged in 2007 (18% of the isolates). The latter clone remained steady (around 30%) during the study period,

**Table 3. Comparison of methicillin-resistant *Staphylococcus aureus* colonization and infection between the infants hospitalized at neonatal intensive care units with and without mupirocin treatment.**

| Characters                 | No mupirocin treatment<br>No. (%) | Mupirocin treatment<br>No. (%) | <i>p</i> value | Odds ratio (95% confidence interval) |
|----------------------------|-----------------------------------|--------------------------------|----------------|--------------------------------------|
| Period                     | 3/2003–2/2004                     | 8/2005–7/2006                  |                |                                      |
| No. subjects               | 783                               | 450                            |                |                                      |
| Male                       | 442 (56)                          | 254 (56)                       | 0.999          | 1 (0.79–1.27)                        |
| Prematurity                | 468 (60)                          | 305 (68)                       | 0.005          | 0.71 (0.55–0.91)                     |
| GA <32 weeks               | 210 (27)                          | 139 (31)                       | 0.127          | 0.82 (0.63–1.07)                     |
| Birth body weight <2500gms | 452 (58)                          | 268 (60)                       | 0.531          | 0.93 (0.73–1.18)                     |
| Birth body weight <1500gms | 157 (20)                          | 124 (28)                       | 0.002          | 0.66 (0.5–0.87)                      |
| Inborn                     | 399 (51)                          | 241 (54)                       | 0.379          | 0.9 (0.71–1.14)                      |
| Admission <7 days old      | 654 (84)                          | 393 (87)                       | 0.072          | 0.74 (0.52–1.04)                     |
| No. infection              | 92 (12)                           | 5 (1.1)                        | <0.001         | 11.85 (4.6–33.3)                     |
| No. colonized              | 323 (41)                          | 39 (8.7)                       | <0.001         | 7.4 (5.1–10.76)                      |
| With infection             | 84 (10.7)                         | 1 (0.22)                       | <0.001         | 53.96 (8.1–1048)                     |
| No. non-colonized          | 460 (59)                          | 410 (91)                       | <0.001         | 0.14 (0.1–0.2)                       |
| With infection             | 8 (1.02)                          | 4 (0.89)                       | 0.819          | 1.15 (0.31–4.56)                     |
| HCW colonized              | 6/123 (4.9)                       | 5/85 (5.9)                     | 0.764          | 0.82 (0.21–3.23)                     |

GA, gestational age; prematurity, GA <37 weeks; HCW, health care worker.  
doi:10.1371/journal.pone.0023001.t003

**Table 4.** Molecular characteristics of methicillin-resistant *Staphylococcus aureus* isolates from the hospitalized infants in NICUs between 1998 and 2007.

| Category             | Year    | No. isolates | PFGE patterns <sup>§</sup>         |            |                                      |          |         |          |            |
|----------------------|---------|--------------|------------------------------------|------------|--------------------------------------|----------|---------|----------|------------|
|                      |         |              | A                                  | C          | D                                    | F        | H       | U        | AN         |
| Clinical             | 1998    | 10           | 9(90)                              | 1(10)      | 0                                    | 0        | 0       | 0        | 0          |
|                      | 1999    | 56           | 34(61)                             | 22(39)     | 0                                    | 0        | 0       | 0        | 0          |
|                      | 2000    | 56           | 34(61)                             | 20(36)     | 1(1.8)                               | 0        | 1(1.8)  | 0        | 0          |
|                      | 2001    | 40           | 37(93)                             | 3(7.5)     | 0                                    | 0        | 0       | 0        | 0          |
|                      | 2003    | 93           | 85(91)                             | 3(3.2)     | 5 (5.4)                              | 0        | 0       | 0        | 0          |
|                      | 2004    | 69           | 41(59)                             | 26(38)     | 2 (2.9)                              | 0        | 0       | 0        | 0          |
|                      | 2005    | 46           | 18(39)                             | 20(43)     | 5(11)                                | 1(2.2)   | 0       | 2(4.3)   | 0          |
|                      | 2006    | 21           | 0                                  | 7(33)      | 14(67)                               | 0        | 0       | 0        | 0          |
|                      | 2007    | 38           | 7(18)                              | 9(24)      | 8(21)                                | 1(2.6)   | 0       | 2(5.3)   | 11(29)     |
|                      | Total   | 429          | 265(62)                            | 111(26)    | 35(8.1)                              | 2(0.47)  | 1(0.23) | 4(0.93)  | 11(2.6)    |
| Colonized in infants | 2003–04 | 464          | 418(90)                            | 43(9.3)    | 3(0.6)                               | 0        | 0       | 0        | 0          |
|                      | 2005–06 | 61           | 8(13)                              | 34(56)     | 15(25)                               | 0        | 0       | 0        | 4(6.6)     |
| Colonized in HCWs    | 2003–04 | 30           | 5(17)                              | 23(77)     | 0                                    | 0        | 0       | 0        | 0          |
|                      | 2005–06 | 5            | 0                                  | 4(80)      | 0                                    | 0        | 0       | 0        | 1(20)      |
| MLST type            |         |              | 239, 1310*                         | 59         | 59                                   | 5        |         | 573#     | 59         |
| PVL-positive         |         |              | 0/106                              | 1/74       | 29/29                                | 0/2      |         | 0/4      | 1/11       |
| SCCmec               |         |              | III, IIIA (105/106),<br>UT (1/106) | IV (74/74) | V <sub>T</sub> (28/29),<br>IV (1/29) | II (2/2) |         | UT (4/4) | IV (11/11) |

PFGE, pulsed-field gel electrophoresis; SCCmec, staphylococcal chromosomal cassette; PVL, Panton-Valentine leukocidin; MLST, multilocus sequence type; UT, untypeable.

\*single locus variant of ST 239.

#single locus variant of ST 1.

§PFGE pattern A significantly decreased while pattern D significantly increased from 1999 to 2007 by Mantel-Haenszel Chi-Square test ( $p < 0.001$ ) for trend.

doi:10.1371/journal.pone.0023001.t004

except in 1998, 2001 and 2003 (no more than 10%). Two community clones, characterized as ST 59/pulsotype D/SCCmec V<sub>T</sub>/PVL-positive and ST 59/pulsotype AN/SCCmec IV/PVL-negative, emerged and increased markedly in 2007. The clone of PFGE pattern A significantly decreased while pattern D significantly increased from 1999 to 2007 by Mantel-Haenszel Chi-Square test ( $p < 0.001$ ) for trend.

Among the 525 colonized MRSA isolates from the infants analyzed, four PFGE patterns were identified. Ninety percent of the 464 isolates from the surveillance period (2003–2004) belonged to ST239/pulsotype A, while more than 80% of the 61 colonized isolates from the period of surveillance with decolonization (2005–2006) belonged to the lineage of ST59. In contrast, most colonized isolates from HCWs, regardless of during which period, belonged to the clone of ST59/pulsotype C/SCCmec IV/PVL-negative.

## Discussion

The present study demonstrates that through infection control measures, HAIs caused by MRSA can be successfully controlled temporarily, even in high level MRSA endemic neonatal intensive care units. In the current study, MRSA HAI density was reduced by 92%; HA bloodstream infection caused by MRSA was reduced from 40 cases per year to only one case per year. With the reduction of HAI caused by MRSA, the HA infection density decreased proportionally and significantly. It appears that zero HA MRSA bacteremia in NICUs is not infeasible, even in MRSA endemic units like ours, if effective infection control measures are implemented and executed strictly.

During the study period, neither the manpower of nursing staff nor the bed occupation rate (more than 95%) in our NICUs was changed. The reduction of MRSA infection was gradual and significantly; it appeared to occur prominently for two specific time periods, from 2001 to 2002 and from 2004 to 2005. For the first time period, we revised the standardized operation procedure for insertion and continuous care of peripherally inserted central venous catheter (PICC). This strategy was based on our findings from the case-control study that the presence of skin infection at onset was associated with MRSA bacteremia in these infants. Augmentation of aseptic procedure and care of the insertion of central venous catheter (CVC) has been documented to be able to reduce the incidence of catheter-related bacteremia [31] and seemed to be somewhat effective in our NICUs. Conducting the strategy of surveillance culture with subsequent decolonization of MRSA carriage in two of three NICUs was the major change of infection control measures in the second time point in the current study. Compared to those during the period of surveillance culture without decolonization, both MRSA colonization rate and MRSA infection rate among the NICU infants decreased significantly. In contrast, the rate of MRSA infection among the non-colonized infants was similar during both periods; even, MRSA HA infection rate increased slightly in 2007 when the strategy of “search and destroy” was discontinued since the supported grant was due. (Afterwards, another project with a cross-over design was granted and conducted since November 2007) Altogether, these findings seemed to suggest that topical mupirocin treatment may effectively decolonize MRSA carriage in these infants and reduce the subsequent MRSA infection. Though the susceptibility test of

MRSA isolates to mupirocin was not performed in this series, we believe that most isolates were susceptible to mupirocin since this medication, though licensed, had not been used in Taiwan for years. However, since no control group (only historical control) was included and not every infant with MRSA colonization received topical mupirocin therapy in the current study, further studies are needed to elucidate this issue [32–35].

Compared to adult ICUs, patients admitted to NICUs are relatively “simple”. Most infants hospitalized immediately after birth and a substantial proportion of the infants are inborn. In addition, vertical transmission of MRSA is infrequently seen in newborns. Therefore, most infants do not have MRSA colonization on admission to NICUs. Then, if the HCWs working in and the environmental objects in NICUs are free from MRSA, the hospitalized infants would not acquire MRSA colonization and/or infection during their NICU stay. In the current study, between 2003 and 2006, nasal MRSA carriage rate among HCWs working in our NICUs ranged from 4.8% to 13% for 4 surveys [23]. But no survey for environmental objects was conducted during the study period. However, the condition would not change, even though MRSA may be introduced into the units anytime, if each HCW can perform hand hygiene exactly and strictly. These may partly explain why the “search and destroy” strategy can be effective in our NICUs but not so effective reported from adult ICUs otherwise [14].

From the molecular analysis of MRSA isolates, we found that the epidemic as well as endemic clone, ST239/pulsotype A (Hungary or Brazilian clone), dominated between 1998 and 2005 in our NICUs, even accounting for 90% of the clinical and colonized isolates in certain years. This clone was almost eradicated, not identified from any clinical isolate, from our NICUs in 2006; however, it still accounted for 13% of the colonized isolates during 2005–2006. This clone returned and identified from clinical isolates again in 2007 and persisted in 2008 (data not shown here) but accounted for less than 20% of the clinical isolates. The clone, ST239/pulsotype A, had prevailed in our hospital (CGMH) and even the whole island between 1992 and 2001, accounting for 54% to 93% of clinical isolates from different hospitals islandwide [26,36–39]. However, the predominance was decreasing during 2004–2005 in our hospital (CGMH) [38], so was in our NICUs in the current study almost at the same

time. In contrast, the clone of ST59/pulsotype C/SCCmec IV/PVL-negative accounted for one-fourth of the clinical isolates and remained relatively steady throughout the study period. The clone accounted for most colonized MRSA isolates from healthy children [27] as well as a substantial proportion of community-associated MRSA infection in Taiwan [28,29,40–42] and thus was categorized as a community strain recently. More than 70% of colonized isolates from HCWs working in these NICUs also belonged to this clone during the study period, suggesting that they might acquire MRSA colonization in the community rather than in the hospital. In addition, two other community clones, also belonging to ST59 lineage, emerged and increased markedly during 2006–2007. It has been reported that community-associated MRSA strains spread into the hospital and even successfully replaced the original hospital strains [43,44]. The changing molecular epidemiology needs more surveillance and its clinical implication and significance needs more observations.

Results from the surveillance culture, we reported previously [23], indicated that preceding or concurrent colonization was detected for >80% of the infants with MRSA infection, and the clinical isolates were indistinguishable with the colonized isolates in >90% of the episodes, on the basis of molecular evidence. These strongly suggest the association between MRSA colonization and subsequent infection and indirectly suggest that to reduce MRSA infection in the infants hospitalized in NICUs, active surveillance with subsequent decolonization of MRSA is mandatory. As the issue which disinfectants or antimicrobials, topical or systemic administration, are effective deserve further studies.

## Acknowledgments

The authors thank all the colleagues working in the neonatal intensive care units for their support and cooperation and the infection control team for their data collection and cooperation.

## Author Contributions

Conceived and designed the experiments: Y-CH. Performed the experiments: Y-CH L-HS. Analyzed the data: Y-CH L-HS. Contributed reagents/materials/analysis tools: R-IL Y-HC. Wrote the paper: Y-CH. Provided advice on research design: T-YL. Supervised conduct of research: T-YL.

## References

1. Boyce JM, Cookson B, Christiansen K, Hori S, Vuopio-Varkila J, et al. (2005) Methicillin-resistant *Staphylococcus aureus*. *Lancet Infect Dis* 5: 653–663.
2. Klevens RM, Edwards JR, Tenover FC, McDonald LC, Horan T, et al. (2006) Change in the epidemiology of methicillin-resistant *Staphylococcus aureus* in intensive care units in US hospitals, 1992–2003. *Clin Infect Dis* 42: 389–391.
3. Wertheim HFL, Vos M, Ott A, van Belkum A, Voss A, et al. (2004) Risk and outcome of nosocomial *Staphylococcus aureus* bacteraemia in nasal carriers versus non-carriers. *Lancet* 364: 703–705.
4. Davis KA, Stewart JJ, Crouch HK, Florez CE, Hospenthal DR (2004) Methicillin-resistant *Staphylococcus aureus* (MRSA) nares colonization at hospital admission and its effect on subsequent MRSA infection. *Clin Infect Dis* 39: 776–782.
5. Ellis MW, Hospenthal DR, Dooley DP, Gray PJ, Murray CK (2004) Natural history of community-acquired methicillin-resistant *Staphylococcus aureus* colonization and infection in soldiers. *Clin Infect Dis* 39: 971–979.
6. Wenzel RP, Perl TM (1995) The significance of nasal carriage of *Staphylococcus aureus* and the incidence of postoperative wound infection. *J Hosp Infect* 31: 13–24.
7. Huang SS, Platt R (2003) Risk of methicillin-resistant *Staphylococcus aureus* infection after previous infection or colonization. *Clin Infect Dis* 36: 281–285.
8. Kluytmans JA, Mouton JW, Ijzerman EP, Vandenbroucke-Grauls CM, Maat AW, et al. (1995) Nasal carriage of *Staphylococcus aureus* as a major risk factor for wound infections after cardiac surgery. *J Infect Dis* 171: 216–219.
9. Garrouste-Orgeas M, Timsit JF, Kallel H, Ben Ali A, Dumay MF, et al. (2001) Colonization with methicillin-resistant *Staphylococcus aureus* in ICU patients: morbidity, mortality, and glycopeptide use. *Infect Control Hosp Epidemiol* 22: 687–692.
10. Roghmann MC, Siddiqui A, Plaisance K, Standiford H (2001) MRSA colonization and the risk of MRSA bacteraemia in hospitalized patients with chronic ulcers. *J Hosp Infect* 47: 98–103.
11. von Eiff C, Becker K, Machka K, Stammer H, Peters G (2001) Nasal carriage as a source of *Staphylococcus aureus* bacteraemia. *N Engl J Med* 344: 11–16.
12. Gregory ML, Eichenwald EC, Puopolo KM (2009) Seven year experience with a surveillance program to reduce methicillin-resistant *Staphylococcus aureus* colonization in a neonatal intensive care unit. *Pediatrics* 123: e790–796.
13. Huang SS, Yokoe DS, Hinrichsen VL, Spurchise LS, Datta R, et al. (2006) Impact of routine intensive care unit surveillance cultures and resultant barrier precautions on hospital-wide methicillin-resistant *Staphylococcus aureus* bacteremia. *Clin Infect Dis* 43: 971–978.
14. Harbarth S, Fankhauser C, Schrenzel J, Christenson J, Gervaz P, et al. (2008) Universal screening for methicillin-resistant *Staphylococcus aureus* at hospital admission and nosocomial infection in surgical patients. *JAMA* 299: 1149–1157.
15. Robicsek A, Beaumont JL, Paule SM, Hacek DM, Thomson RB, Jr., et al. (2008) Universal surveillance for methicillin-resistant *Staphylococcus aureus* in 3 affiliated hospitals. *Ann Intern Med* 148: 409–418.
16. Raineri E, Crema L, De Silvestri A, Acquarolo A, Albertario F, et al. (2007) Methicillin-resistant *Staphylococcus aureus* control in an intensive care unit: a 10 year analysis. *J Hosp Infect* 67: 308–315.
17. Chang SC, Hsu LY, Luh KT, Hsieh WC (1988) Methicillin-resistant *Staphylococcus aureus* infection. *J Formos Med Assoc* 87: 157–163.
18. Hsueh PR, Liu CY, Luh KT (2002) Current status of antimicrobial resistance in Taiwan. *Emerg Infect Dis* 8: 132–137.

19. Chuang YY, Huang YC, Lee CY, Lin TY, Lien R, et al. (2004) Methicillin-resistant *Staphylococcus aureus* bacteremia in neonatal intensive care units: analysis of 90 episodes. *Acta Paediatr* 93: 786–790.
20. Garner JS, Jarvis WR, Emori TG, Horan TC, Hughes JM (1988) CDC definitions for nosocomial infections. *Am J Infect Control* 16: 128–140.
21. Santos RP, Mayo TW, Siegel JD (2008) Active Surveillance Cultures and Contact Precautions for Control of Multidrug-Resistant Organisms: Ethical Considerations. *Clin Infect Dis* 2008;47: 110–116.
22. Huang YC, Lee CY, Su LH, Chang LY, Lin TY (2005) Methicillin-resistant *Staphylococcus aureus* in neonatal intensive care units: genotyping analysis and case-control study. *Acta Paediatr Tw* 46: 156–160.
23. Huang YC, Chou YH, Su LH, Lien RI, Lin TY (2006) Methicillin-resistant *Staphylococcus aureus* colonization and its association with infection among infants hospitalized in neonatal intensive care units. *Pediatrics* 118: 469–474.
24. National Committee for Clinical Laboratory Standards. (2000) Performance Standard for Antimicrobial Disk Susceptibility Tests, 7<sup>th</sup> ed., approved standard. Wayne PA: National Committee for Clinical Laboratory Standards.
25. Huang YC, Su LH, Wu TL, Lin TY (2005) Molecular surveillance of methicillin-resistant *Staphylococcus aureus* in neonatal intensive care units. *Infect Control Hosp Epidemiol* 26: 157–160.
26. Huang YC, Su LH, Wu TL, Liu CE, Young TG, et al. (2004) Molecular epidemiology of clinical isolates of methicillin-resistant *Staphylococcus aureus* in Taiwan. *J Clin Microbiol* 42: 307–310.
27. Huang YC, Hwang KP, Chen PY, Chen CJ, Lin TY (2007) Prevalence of methicillin-resistant *Staphylococcus aureus* nasal colonization among Taiwanese children, 2005–2006. *J Clin Microbiol* 45: 3992–3995.
28. Huang YC, Ho CF, Chen CJ, Su LH, Lin TY (2008) Comparative molecular analysis of community-associated and healthcare-associated methicillin-resistant *Staphylococcus aureus* isolates from children in northern Taiwan. *Clin Microbiol Infect* 14: 1167–1172.
29. Chen CJ, Su LH, Chiu CH, Lin TY, Wong KS, et al. (2007) Clinical features and molecular characteristics of invasive community-acquired methicillin-resistant *Staphylococcus aureus* infections in Taiwanese children. *Diag Microbiol Infect Dis* 59: 287–293.
30. Enright MC, Day NP, Davies CE, Peacock SJ, Spratt BG (2000) Multilocus sequence typing for characterization of methicillin-resistant and methicillin-susceptible clones of *Staphylococcus aureus*. *J Clin Microbiol* 38: 1008–1015.
31. Aly H, Herson V, Duncan A, Herr J, Bender J, et al. (2005) Is bloodstream infection preventable among premature infants? A tale of two cities. *Pediatrics* 115: 1513–1518.
32. Laupland KB, Conly JM (2003) Treatment of *Staphylococcus aureus* colonization and prophylaxis for infection with topical intranasal mupirocin: an evidence-based review. *Clin Infect Dis* 37: 933–938.
33. Harbarth S, Dharan S, Liassine N, Herrault P, Auckenthaler R, et al. (1999) Randomized, placebo-controlled, double-blind trial to evaluate the efficacy of mupirocin for eradicating carriage of methicillin-resistant *Staphylococcus aureus*. *Antimicrob Agents Chemother* 43: 1412–1416.
34. Mody L, Kaulfman CA, McNeil SA, Galecki AT, Bradley SF (2003) Mupirocin-based decolonization of *Staphylococcus aureus* carrier in residents of 2 long-term care facilities: a randomized, double-blind, placebo-controlled trial. *Clin Infect Dis* 37: 1467–1474.
35. Perl TM, Cullen JJ, Wenzel RP, Zimmerman B, Pfaller MA, et al. (2002) Intranasal mupirocin to prevent postoperative *Staphylococcus aureus* infections. *N Engl J Med* 346: 1871–1877.
36. Chen ML, Chang SC, Pan HJ, Hsueh PR, Yang LS, et al. (1999) Longitudinal analysis of methicillin-resistant *Staphylococcus aureus* isolates at a teaching hospital in Taiwan. *J Formos Med Assoc* 98: 426–432.
37. Aires de Sousa M, Crisostomo MI, Sanches IS, Vaz MJ, Saraiva Z, et al. (2003) Frequent recovery of a single clonal type of multidrug-resistant *Staphylococcus aureus* from patients in two hospitals in Taiwan and China. *J Clin Microbiol* 41: 159–163.
38. Huang YC, Su LH, Wu TL, Lin TY (2006) Changing molecular epidemiology of methicillin-resistant *Staphylococcus aureus* bloodstream isolates from a teaching hospital in northern Taiwan. *J Clin Microbiol* 44: 2268–2270.
39. Chen CJ, Hsueh PR, Su LH, Chiu CH, Lin TY, et al. (2009) Change in the molecular epidemiology of methicillin-resistant *Staphylococcus aureus* bloodstream infections in Taiwan. *Diag Microbiol Infect Dis* 65: 199–201.
40. Wang CC, Lo WT, Chu ML, Siu LK (2004) Epidemiological typing of community-acquired methicillin-resistant *Staphylococcus aureus* isolates from children in Taiwan. *Clin Infect Dis* 39: 481–487.
41. Boyle-Vavra S, Ereshesky B, Wang CC, Daum RS (2005) Successful multiresistant community-associated methicillin-resistant *Staphylococcus aureus* lineage from Taipei, Taiwan, that carries either the novel staphylococcal chromosome cassette *mec* (SCC*mec*) type V<sub>T</sub> or SCC*mec* type IV. *J Clin Microbiol* 43: 4719–4730.
42. Wang JL, Chen SY, Wang JT, Wu GH, Chiang WC, et al. (2008) Comparison of both clinical features and mortality risk associated with bacteremia due to methicillin-resistant *Staphylococcus aureus* and methicillin-sensitive *S. aureus*. *Clin Infect Dis* 46: 799–806.
43. Saiman L, O’Keeffe M, Graham PL, III, Wu F, Said-Salim B, et al. (2003) Hospital transmission of community-acquired methicillin-resistant *Staphylococcus aureus* among postpartum women. *Clin Infect Dis* 37: 1313–1319.
44. O’Brien FG, Pearman JW, Gracey M, Riley TV, Grubb WB (1999) Community strain of methicillin-resistant *Staphylococcus aureus* involved in a hospital outbreak. *J Clin Microbiol* 37: 2853–2862.
